## RESEARCH ARTICLE

Calls of the little auk (*Alle alle*) chicks reflect their behavioural contextsAnna N. Osiecka<sup>1,2\*</sup>, Elodie F. Briefer<sup>2</sup>, Dorota Kidawa<sup>1</sup>, Feliksa Żurawska<sup>1</sup>, Katarzyna Wojczulanis-Jakubas<sup>1</sup>

**1** Department of Vertebrate Ecology and Zoology, Faculty of Biology, University of Gdańsk, Gdańsk, Poland, **2** Behavioural Ecology Group, Section for Ecology and Evolution, Department of Biology, University of Copenhagen, Copenhagen, Denmark

\* [ann.osiecka@gmail.com](mailto:ann.osiecka@gmail.com)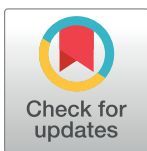

## Abstract

Animal vocalisations can often inform conspecifics about the behavioural context of production and the underlying affective states, hence revealing whether a situation should be approached or avoided. While this is particularly important for socially complex species, little is known about affective expression in wild colonial animals, and even less to about their young. We studied vocalisations of the little auk (*Alle alle*) chicks in the Hornsund breeding colony, Svalbard. Little auks are highly colonial seabirds, and adults convey complex behavioural contexts through their calls. We recorded chick calls during two contexts of opposite affective valence: handling by a human, and while they interact with their parents inside the nest. Using permuted discriminant function analysis and a series of linear mixed models, we examined the effect of the production context/associated affective valence on the acoustic parameters of those calls. Calls were reliably classified to their context, with over 97% accuracy. Calls uttered during handling had higher mean entropy, fundamental frequency, as well as lower spectral centre of gravity and a less steep spectral slope compared to calls produced during interactions with a parent inside the nest. The individuality of handling calls, assessed by information content, was lower than the individuality of calls uttered in the nest. These findings suggest that seabird chicks can effectively communicate behavioural/affective contexts through calls, conveying socially important messages early in development. Our results are mostly in line with emotional expression patterns observed across taxa, supporting their evolutionary continuity.

## OPEN ACCESS

**Citation:** Osiecka AN, Briefer EF, Kidawa D, Żurawska F, Wojczulanis-Jakubas K (2024) Calls of the little auk (*Alle alle*) chicks reflect their behavioural contexts. PLoS ONE 19(2): e0299033. <https://doi.org/10.1371/journal.pone.0299033>

**Editor:** Jon T. Sakata, McGill University, CANADA

**Received:** September 5, 2023

**Accepted:** February 2, 2024

**Published:** February 23, 2024

**Copyright:** © 2024 Osiecka et al. This is an open access article distributed under the terms of the [Creative Commons Attribution License](https://creativecommons.org/licenses/by/4.0/), which permits unrestricted use, distribution, and reproduction in any medium, provided the original author and source are credited.

**Data Availability Statement:** Raw data generated in this study are available at: <https://osf.io/nwprfk/>

**Funding:** This study was funded by grants awarded to the following authors: KWJ: grant no. 2017/25/B/NZ8/01417 funded by The National Science Centre (Narodowe Centrum Nauki), DK: grant no. 2017/26/D/NZ8/00005 (Narodowe Centrum Nauki), AO: University of Gdańsk Grants no. MN 539-D050-B853-21 and UGFirst 533-0C20-GF12-22. The funders had no role in study design, data collection and analysis, decision to publish, or preparation of the manuscript.

## Introduction

Acoustic communication plays a crucial role for many animals, and it can be especially well-developed in socially complex species [1, 2]. Certain information about the environment or behavioural context can be particularly important to communicate to other group members. For example, sharing information about predator presence or food location can be key for colonial or cooperating animals.

**Competing interests:** The authors have declared that no competing interests exist.

**Abbreviations:**  $f_0$ , fundamental frequency; LMM, linear mixed model; mean  $f_0$ , mean fundamental frequency; pDFA, permuted discriminant function analysis; Q25%, frequency value at the upper limit of the first quartile of energy; Q50%, frequency value at the upper limit of the second quartile of energy; Q75%, frequency value at the upper limit of the third quartile of energy.

Behavioural contexts associated with functionally important stimuli, such as food or threats, can trigger short-term responses associated with physiological, behavioural and cognitive changes, termed ‘emotions’ or ‘affective states’ [3]. Affective states in non-human animals are commonly measured along two fundamental dimensions [4]: arousal (bodily activation) and valence (positive or negative) [5, 6]. They are associated with neuro-physiological, behavioural and cognitive changes [3, 7], serving as guides for adaptive behaviour. In other words, stimuli that promote fitness (e.g. food, caretakers, mating opportunities) are predicted to evoke positive states and typically result in approach behaviour, whereas threatening stimuli (e.g. predators, fights, perilous conditions) are predicted to elicit negative states and generally lead to avoidance [5]. It is important to note that, when discussing emotions one does not necessarily refer to complex feelings, but rather the very basic triggers of behavioural responses [3–7]. Emotional contagion, i.e. transfer of affective states to others, is a key behavioural aspect in socially living animals [8], used to alert the group about both positive and negative contexts, but also maintain social bonds [8–10]. Vocalisations are a powerful means to convey affective - and therefore behavioural - contexts to others [11–13]. Changes in acoustic signals reflecting those contexts can be perceived within [14] and even across species [15], guiding appropriate responses towards the producer of the vocalisation or the situation in which it finds itself [8, 16, 17]. However, dynamic information such as behavioural or emotional contexts may interfere with static information conveyed in calls, such as identity of the caller [18].

The little auk (*Alle alle*) is a highly colonial seabird that maintains long-term social bonds [19]. Little auk pairs produce one egg per year [19], so that no sibling competition occurs. Both partners contribute to and coordinate their parental efforts [20]. Adults of this species have a complex vocal repertoire (eight different call types used during mating and incubation) [13], and convey contextual and emotional information through their calls [13]. Little auk chicks are known to produce one call type during social interactions—the *begging* call [21]—used while they wait for their parent’s return to the nest and during interactions with the parents. The *begging* call is highly individually specific [21] and its acoustic parameters change as the chicks grow [21]. We have also observed some chicks producing calls as they were being handled for ornithological procedures, yet these calls (from here on, the *handling* calls) were not previously described. Aside from this, little is known about the vocal behaviour of little auk chicks [21], or vocal ontogeny in this species.

In this study, we examined whether vocalisations uttered by young little auk chicks already reflect the behavioural contexts of their production - and, if so, which acoustic parameters encode this information. We also investigated whether the information content of chick calls varies between those contexts.

## Methods

### Ethics statement

Fieldwork was performed under permission from the Governor of Svalbard (17/00663-2, 20/00373-8), following Association for the Study of Animal Behaviour guidelines for animal studies [22]. Birds were handled by a licensed ringer (KW), permit no. 1095, type: C, issued by Museum Stavanger, Norway).

### Site, subjects, and set-up

All data were collected in the little auk colony in Hornsund, Spitsbergen (77°00′ N, 15°33′ E). Recordings were made over the chick rearing period of the 2017 and 2021 breeding seasons, around the 7<sup>th</sup> day (approximately 5 to 8 days) of chicks’ life.

In 2017, audio material was collected via an Olympus ME-51S stereo microphones (frequency response 100–15,000 Hz) placed inside 16 nests in such a way as to not disturb the birds' normal activities [21]. Each microphone was connected to an Olympus LS-3 or LS-P4 digital voice recorder (sampling rate 48 kHz, 16 bits) placed outside of the nest and hidden under a rock to prevent both damage to the equipment and disturbance to the animals. This was paired with video recordings to control for presence/absence of the parent. Only calls produced at times during which a parent was present in the nest were selected for this study.

In 2021, chicks were recorded during handling (weighting) via a hand-help recorder (Olympus LS-12) with a built-in microphone. Chicks were not specifically stimulated to vocalise. Therefore, all recorded calls represent 'spontaneous' vocalisations. Note, however, that not all handled chicks vocalised—and among those who did, the call production rate differed greatly (Table 1). Chick sex was unknown in either group—however, note that little auk vocalisations are not affected by the caller's sex [23].

The effect of the employed equipment (internal vs. external microphone) and recording conditions (inside a rocky burrow vs. in open air) on the acoustic parameters of the recorded calls was tested in an additional experiment (see S1 File). This included broadcasting the calls in conditions mimicking the recording conditions, and re-recording them with both internal and external microphones. Results showed that while the recording set-up had a significant influence over the recorded parameters of the calls, it did not interfere with the overall classification accuracy. See S1 File for a detailed description of this experiment.

We manually extracted all good quality calls found within the recordings using Raven Pro 1.6.4 (Cornell Lab of Ornithology, Ithaca, USA), assigning them to individual chicks and production contexts (during handling versus inside the nest with a parent; further on *handling* and *begging*, respectively). Both the number of successfully recorded chicks and number of vocalisations produced by those varied greatly between contexts and individuals (Table 1). Since the *begging* and *handling* calls are rather similar to the human ear and are not always obviously different upon a visual inspection of their spectrograms (Fig 1), for the purpose of this study, we decided to treat them as a single call type emitted in two behavioural contexts.

The two behavioural contexts were assigned putative affective valence based on threats/promoters of fitness—i.e., situations that the animals should be motivated to approach or avoid [3, 6, 24]. Therefore, since *handling* likely represents response to a threat, it was assigned putative negative valence (avoidance). There is no sibling competition in the little auk (since broods are composed of one egg only) [19] and adults feed any chick they find in their nest chamber without adverse reaction to it [21]—therefore, *begging* calls were assigned putative positive valence (approach). Note that this approach does not correct for subtler behavioural contexts, such as e.g. frustration related to hunger or prolonged waiting, and aims to refer to the overall valence of the state as positive or negative contexts only. Also note that the use of terms “approach/avoidance” does not necessarily translate into a physical action, but rather an elicited reaction to, or internal motivation to approach/avoid the stimulus.”

## Analysis

All analyses were performed in R environment (v. 4.1.3) [25]. Calls were analysed using the *analyze* function (*soundgen* package [26]) with the following settings: sampling rate = 48000, dynamic range = 60, pitch floor = 800, pitch ceiling = 3500, step = 5. The following parameters were extracted: sound duration, mean entropy, frequency value at the upper limit of the first (Q25%), second (Q50%), and third (Q75%) quartiles of energy, mean fundamental frequency (mean  $f_0$ ), and spectral slope. These were selected as standard acoustic parameters used in the studies of vocal expression of affect.

Table 1. Number of calls per individual and production context.

| Context      | <i>begging</i>       |                   | <i>handling</i>       |                  |
|--------------|----------------------|-------------------|-----------------------|------------------|
|              | individual           | no. calls         | individual            | no. calls        |
|              | N_01                 | 224               | H_01                  | 1                |
|              | N_02                 | 55                | H_02                  | 9                |
|              | N_03                 | 293               | H_03                  | 4                |
|              | N_04                 | 124               | H_04                  | 2                |
|              | N_05                 | 26                | H_05                  | 9                |
|              | N_06                 | 143               | H_06                  | 1                |
|              | N_07                 | 216               | H_07                  | 2                |
|              | N_08                 | 67                | H_08                  | 32               |
|              | N_09                 | 81                | H_09                  | 11               |
|              |                      |                   | H_10                  | 5                |
|              |                      |                   | H_11                  | 69               |
|              |                      |                   | H_12                  | 13               |
|              |                      |                   | H_13                  | 1                |
|              |                      |                   | H_14                  | 1                |
|              |                      |                   | H_15                  | 7                |
|              |                      |                   | H_16                  | 32               |
|              |                      |                   | H_17                  | 1                |
|              |                      |                   | H_18                  | 3                |
|              |                      |                   | H_19                  | 1                |
|              |                      |                   | H_20                  | 1                |
|              |                      |                   | H_21                  | 1                |
| <b>Total</b> | <b>9 individuals</b> | <b>1229 calls</b> | <b>21 individuals</b> | <b>206 calls</b> |

<https://doi.org/10.1371/journal.pone.0299033.t001>

To investigate the difference in the vocal expression between the two contexts/associated putative affective states, we performed a permuted discriminant function analysis (pDFA [27]), pooling all available vocalisations from all individuals and from across the two contexts together (1435 calls in total, Table 1). The use of pDFA allowed us to test the effect of contexts/affective valence (test factor) on the extracted acoustic parameters of the calls (input variables), while controlling for repeated measures of the same individuals (control factor) and the unbalanced dataset [27]. A pDFA with nested design was conducted using the *pDFA.nested* function (R. Mundry, based on function *lda* of the *MASS* package [28]). The pDFA used all available subjects (30 individuals) to derive the discriminant function. We ran a total of 1000 permutations for the analysis.

To understand the direction of changes in call parameters, we additionally ran a series of linear mixed models (LMM; *lmer* function, *lme4* package [29]), using each parameter as a response variable (one model per parameter), context/affective valence as a fixed factor, and chick identity as a random factor to control for repeated measures of chicks within contexts (since many chicks produced several calls). Data distribution was tested using Q-Q plots (*qqnorm* function, *stats* package [30]) To conform to normal distribution, mean entropy values were log-transformed as:  $\log(\text{mean entropy} + 1 - \min(\text{mean entropy}))$ . The model residuals for all other parameters did not deviate from a normal distribution. To extract the p-values of the LMMs, we used the *PBmodcop* function (*pbkrtest* package [31]), comparing models with and without context included.

To investigate whether calls associated with the two contexts carry a different individual information load, we used individuals who produced at least five calls (i.e., nine individuals

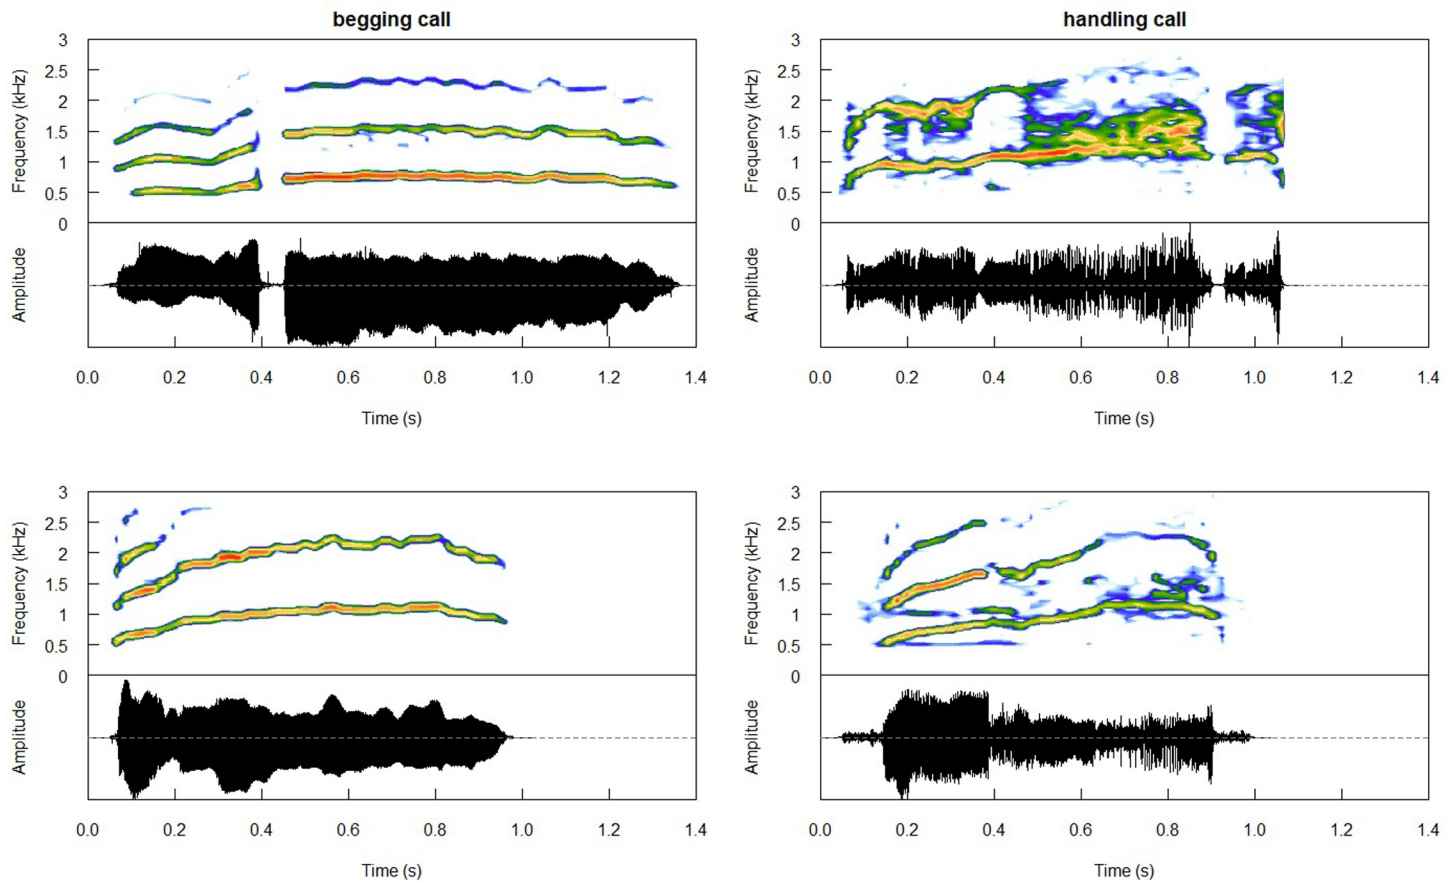

**Fig 1.** Spectrograms (*seewave* package [36]) of the calls produced inside the nest when interacting with a parent (left panel) and during handling (right panel). Each call was produced by a different chick.

<https://doi.org/10.1371/journal.pone.0299033.g001>

per context), and randomly selected five calls for each of them. We calculated the Kaiser-Meyer-Olkin criterion (function *KMO*, *EFAtools* package [32]), which confirmed the data were appropriate for a principal components analysis (PCA; overall KMO score: 0.73). We then ran a PCA including all extracted acoustic parameters (function *prcomp*, *stats* package [30]), and used all 11 principal components to calculate Beecher's information statistic [33] ( $H_s$ ; function *calcHS*, *IDmeasurer* package [34]), which automatically provides  $H_s$  values for both all and significant variables only). Beecher's statistic provides a measure of the level of individuality coded within a signal [33] and is a robust, standard method allowing for cross-species comparisons [35]. The  $H_s$  values stand for bits of information, and can be translated as the approximate number of individuals that can theoretically be distinguished using a given signal, calculated as  $2^{H_s}$ .

## Results

Calls could be reliably classified to their context of production by the pDFA above chance levels ( $p < 0.005$ ; Table 2 and Fig 1). There were significant differences between contexts in the mean entropy, mean  $f_0$ , Q25%, Q50%, and spectral slope, but not in the call duration or Q75% (Table 3 and Fig 2). Spectral slope was steeper in the *begging* calls (Table 3 and Fig 2). Q25% and Q50% were both lower in the *handling* calls, and the mean  $f_0$  and mean entropy were higher (i.e. less tonal) in the *handling* calls compared to the *begging* calls (Table 3 and Fig 2).

**Table 2. Results of the permuted discriminant function analysis for the *handling* and *begging* calls, using 7 raw acoustic parameters.** Significance level indicated with asterisks.

| Result                                         |                 |
|------------------------------------------------|-----------------|
| No. context categories (levels of test factor) | 2               |
| No. individuals                                | 30              |
| Total no. calls.                               | 1435            |
| Correctly classified (%)                       | 99.22           |
| Chance level (%)                               | 78.65           |
| <i>P</i> value for classified                  | <b>0.02*</b>    |
| <b>Correctly cross-classified (%)</b>          | <b>97.32</b>    |
| <b>Chance level for cross-classified (%)</b>   | <b>59.64</b>    |
| Relative cross-classification level            | 1.63            |
| <i>P</i> value for cross-classified            | <b>0.001***</b> |

<https://doi.org/10.1371/journal.pone.0299033.t002>

Calls uttered during interaction with the parent inside the nest had a  $H_s = 5.26$  (for both all and significant variables), while calls uttered during handling had a  $H_s = 0.79$  for significant variables and  $H_s = 1.27$  when including all variables (Table 4). In other words, calls uttered in during handling were less individually specific than the *begging* calls (Fig 3).

## Discussion

Communicating behavioural contexts and the underlying affective information is particularly important for socially complex species. We investigated whether calls of seabird chicks carry cues to two behavioural contexts of opposite affective valence. Our results showed that within the first week after hatching, chicks of the colonial seabird, little auk, already have the potential to effectively convey in their calls, information about the context in which they find themselves, which is likely associated with a specific affective valence. Their expression patterns follow the general trends observed across taxa [6, 41–47].

Vocal expression of emotional valence has previously been described in adult little auks [13]. Some of the parameters that encode behavioural or affective information in little auk chick calls align with those observed in adults [13]. Similar to adult vocalisations, chick calls associated with a positive context exhibited a steeper spectral slope and higher spectral centre of gravity compared to those associated with a negative context. However, while adult calls uttered in a positive context (interaction with the partner) show a higher mean fundamental frequency (mean  $f_0$ ) and a shorter sound duration [13] compared to negative contexts, in chick calls, we observed a lower mean  $f_0$  in the positive context and no context effect on sound duration. Those differences can potentially arise from the parameters being related to emotional arousal rather than valence–arousal being a dimension [4] we could not reliably measure, or might be due to differences in emotion expression between call types, as often observed in other species [44, 46]. For example, while a threat presence (handling) and presence of a parent returning from a long foraging trip might well trigger emotions of opposing valence, they could both result in high arousal. At the same time, while begging calls are related to a context that should activate the pleasant-appetitive motivational system and elicit approach, they can also reflect some levels of frustration [48] and stress due to e.g. hunger [49], or prolonged waiting for the parent [50]. While handling by a human can be reliably considered a stressor [51–53], also such prolonged hunger and frustration can increase stress hormone levels [54]—and these, in turn, might reflect on the begging behaviour (e.g. rate of begging calls) [55, 56]. It is therefore possible that the observed differences result from behavioural and emotional complexity not accounted for in this study. Dedicated investigations



**Table 3. Results of the linear mixed models testing the effect of production context on raw acoustic parameters.** Letters (A)-(G) refer to the respective panels in Fig 2.

|                    |            | Predictors |                      | Scaled residuals |       |        |      |      | p-value   | Interpretation                                |
|--------------------|------------|------------|----------------------|------------------|-------|--------|------|------|-----------|-----------------------------------------------|
|                    |            | begging    | handling (intercept) | Min              | 1Q    | Median | 3Q   | Max  |           |                                               |
| Sound duration (s) | Estimates  | -0.040     | 0.347                | -4.77            | -0.37 | -0.04  | 0.33 | 8.87 | >0.05     | No effect (A)                                 |
|                    | Std. Error | 0.063      | 0.036                |                  |       |        |      |      |           |                                               |
|                    | t-value    | -0.639     | 9.509                |                  |       |        |      |      |           |                                               |
| Mean f0 (Hz)       | Estimates  | -317.080   | 1883.050             | -4.27            | -0.50 | 0.07   | 0.60 | 3.69 | <0.05*    | Increase during handling (B)                  |
|                    | Std. Error | 135.73     | 79.930               |                  |       |        |      |      |           |                                               |
|                    | t-value    | -2.336     | 23.560               |                  |       |        |      |      |           |                                               |
| Q25% (Hz)          | Estimates  | 913.700    | 572.000              | -3.81            | -0.53 | -0.06  | 0.56 | 4.87 | <0.001*** | Decrease during handling (C)                  |
|                    | Std. Error | 188.400    | 110.700              |                  |       |        |      |      |           |                                               |
|                    | t-value    | 4.850      | 5.166                |                  |       |        |      |      |           |                                               |
| Q50% (Hz)          | Estimates  | 742.200    | 1518.600             | -4.98            | -0.42 | -0.03  | 0.40 | 7.47 | <0.01**   | Decrease during handling (D)                  |
|                    | Std. Error | 285.700    | 163.100              |                  |       |        |      |      |           |                                               |
|                    | t-value    | 2.597      | 9.313                |                  |       |        |      |      |           |                                               |
| Q75% (Hz)          | Estimates  | -171.5     | 3535.500             | -4.92            | -0.40 | 0.02   | 0.43 | 9.31 | >0.05     | No effect(E)                                  |
|                    | Std. Error | 460.100    | 262.00               |                  |       |        |      |      |           |                                               |
|                    | t-value    | -0.373     | 13.494               |                  |       |        |      |      |           |                                               |
| Spectral slope     | Estimates  | -1.552     | -1.240               | -4.38            | -0.56 | 0.05   | 0.57 | 5.16 | <0.001*** | Less steep during handling                    |
|                    | Std. Error | 0.165      | 0.093                |                  |       |        |      |      |           |                                               |
|                    | t-value    | -9.405     | -13.305              |                  |       |        |      |      |           |                                               |
| Mean entropy       | Estimates  | -0.128     | 0.172                | -5.42            | -0.32 | -0.01  | 0.29 | 7.74 | <0.001*** | Increase during handling, i.e. less tonal (G) |
|                    | Std. Error | 0.020      | 0.011                |                  |       |        |      |      |           |                                               |
|                    | t-value    | -6.587     | 15.497               |                  |       |        |      |      |           |                                               |

<https://doi.org/10.1371/journal.pone.0299033.t003>

using measures of arousal (such as heart rate or corticosterone levels) and detailed behavioural observations (e.g. accounting for the time since last feeding) would be helpful to better understand affective expression patterns in the species.

Chick calls associated with a positive context had a reduced mean entropy compared to calls of negative context. This parameter was not examined in adults in our previous study [13]—to allow comparisons, we ran an additional analysis on the previously published data, the results of which showed increased entropy in calls associated with a negative valence across call types (S1 File). High values of entropy reflect less tonal and therefore more chaotic/noisy calls. Therefore, the high entropy values of the calls produced during handling suggest that those calls are more noisy and less tonal than calls produced at the nest. For animals that encode their identity in the spectral parameters of their calls, like the little auk [21, 57], increased noisiness of the signal will likely result in a loss of such information. That is, more chaotic calls may potentially carry less bits of information in their structure. Indeed, distress calls showed a much lower potential for individuality coding than calls associated with a positive context. This could have significant social consequences, such as impaired individual recognition, and suggest that more critically important messages are conveyed instead, e.g. presence of a threat. Some loss of individual information has previously been shown in other species, depending on the valence [58] or arousal [59, 60] of the caller. If distress calls are aimed at the stressor (in this case: the human researcher handling the chick) and intended e.g. to induce release [61], losing the static individual information should not be problematic to the caller [18]. In fact, such loss can be beneficial in situations of distress, if one can catch the attention of any available rescuer, not just their caretaker's [62]. Surprisingly, cross-fostering experiments have shown that little auk parents will feed any young found in their burrow,

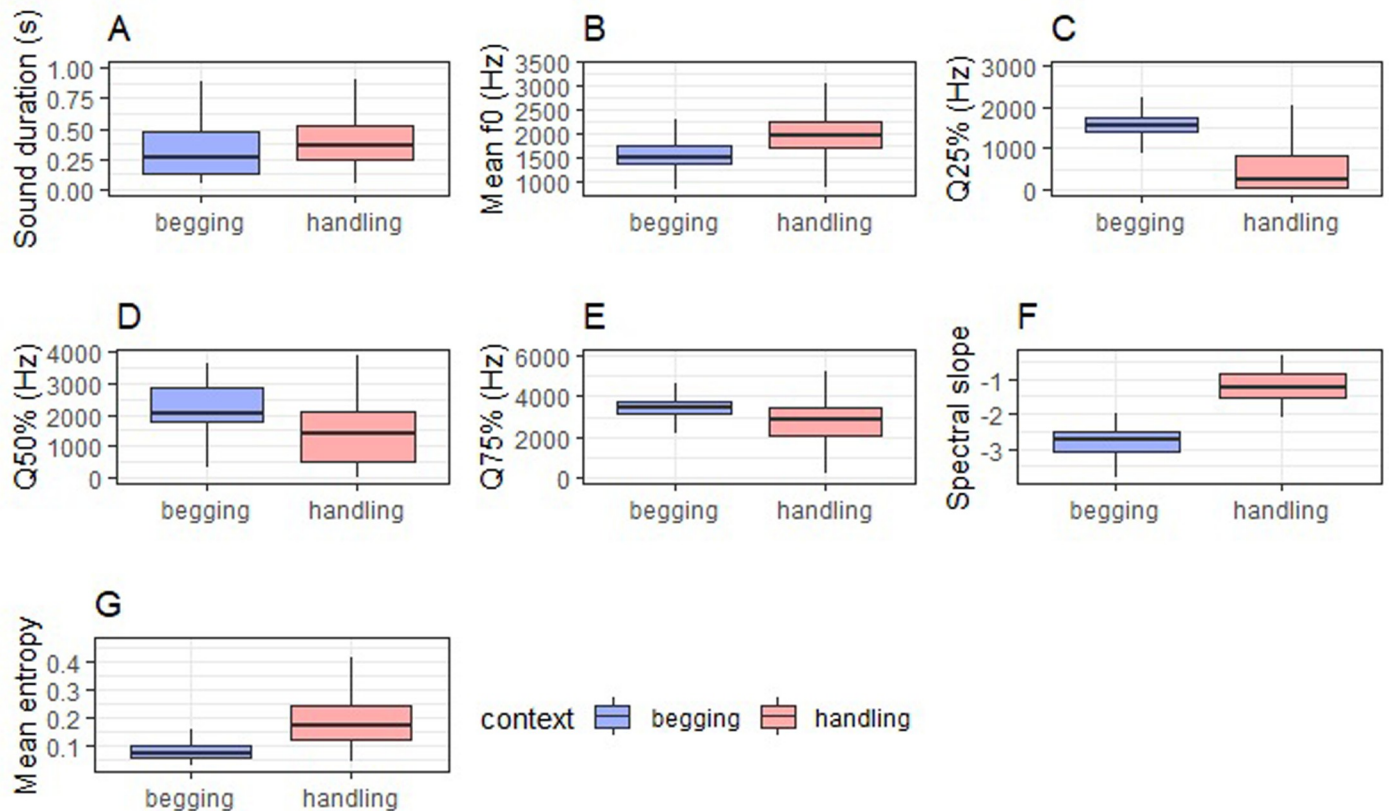

**Fig 2. Effect of the behavioural context on the acoustic parameters of the calls.** Plots use accessible scientific colour palettes [37–39].

<https://doi.org/10.1371/journal.pone.0299033.g002>

which also suggests that individual information in chicks calls might be functionally unimportant in this species [21], or simply overridden by situationally critical information, such as communicating presence of a threat with a noisy signal.

Increased noisiness of acoustic signals is indeed often related to increased arousal or negative valence [11, 41, 42]. In birds, it has been shown to reflect wellbeing of commercially bred chicks [41] (*Gallus gallus domesticus*), where it has been suggested as a useful tool in welfare assessment. Being a parameter that reflects a level of disorder rather than a specific value (such as e.g. mean  $f_0$ ) that may change as an animal grows or ages, it can prove a reliable indicator of an individual's emotional state without prior knowledge of its age or weight. As such, spectral entropy is a promising parameter for social communication in large groups.

Little auk calls are highly individually specific [21, 57], but also reflect the size and overall body condition of the calling chick [21] (similarly to those of the Wilson's storm petrel, *Oceanites oceanicus* [63]). Here, we did not correct for the chicks' size, yet the recordings used come from chicks of roughly the same age (5–8 days after hatching), which corresponds to

**Table 4. Beecher's information statistic of the *begging* and *handling* calls indicates, that call become much less individually specific in a situation of distress.**

| Context         | Hs all | Hs significant | Meaning                                                      |
|-----------------|--------|----------------|--------------------------------------------------------------|
| <i>begging</i>  | 5.26   | 5.26           | Theoretically allows distinction of at least 38 individuals  |
| <i>handling</i> | 1.11   | 0.45           | Theoretically allows distinction of at least 1–2 individuals |

<https://doi.org/10.1371/journal.pone.0299033.t004>



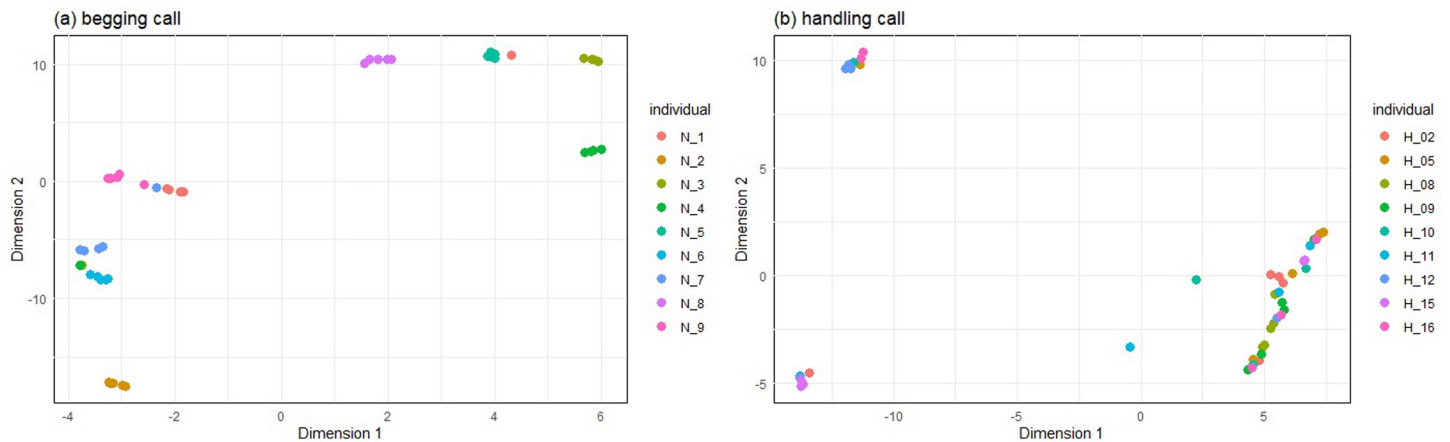

**Fig 3.** S-UMAP classification to individual for the a) *begging* and b) *handling* calls. While *begging* calls cluster quite well to individuals, this is not the case when the *handling* calls are considered. Plotted using *umap* function of package *uwot* [40], with five nearest neighbours, using all PCA scores of calls emitted by individuals with at least five recorded calls.

<https://doi.org/10.1371/journal.pone.0299033.g003>

comparable body sizes [21]. While we have employed methods that correct for multiple testing of the same individuals, we acknowledge that this study would have benefited from testing the same individuals in both behavioural contexts. However, this study aimed to maximise the use of already existing data to limit the disturbance caused by research activities and avoid unnecessary handling [64]. Here, we took advantage of the available recordings made inside the nests in 2017 [21], supplementing them with additional recordings taken during chick handling for population monitoring in 2021. Little auk handling calls are produced in a very unpredictable manner, and few animals vocalise when handled [13]—this is true for both chicks and adults. Without external stimulation by the researcher, which we avoid, collecting recordings from both contexts for the same individuals usually proves unsuccessful, and it cannot be guaranteed that an animal recorded in one context will vocalise in another. As a result, the available recordings presented in this study are the only chick vocalisations available to investigate context-related changes in call structure. Note that we did not account for the chicks' sex in our analyses, since this information was not available. However, since adult little auks show no sex differences in their calls [23], we are confident that this factor does not significantly impact our results.

An important caveat of this study is that we only had access to two behavioural contexts (one context per putative affective valence) with their associated calls—which may represent either a gradation of one call type, or two distinct call types. This is because the vocal activity of the young chicks in this species is rather limited in contexts—only the *begging* calls have been previously observed in the young chicks during the nesting period [21]. The data presented here enrich our knowledge of the chicks' behaviour through adding the negative contexts. They are also all that was possible to record of the young chicks' vocalisations within the logistical and ethical limitations, and as such present an important contribution. We also were not able to compare the stability of the two calls across the season (within individuals) and years (across individuals). The little auk *begging* calls change as the chicks grow [21], and it would be ideal to follow the affective expression over ontogeny—unfortunately, such data are not currently available. On the other hand, seabird calls tend to be individually stable over the years [57, 65, 66], and we do not expect repertoire changes to occur within small timescales. The *begging* and *handling* calls are not obviously different upon a visual inspection of their spectrograms (Fig 1). Adult little auks use some of their calls across multiple contexts [13], and this is

likely true also in case of the chicks. Nevertheless, our results may in fact reflect call type differences. In either case, the vocalisations used in this study reflect two very different behavioural contexts clearly conveyed by the sender, and we are confident that they can be safely interpreted as such. Note that by discussing conveying the behavioural or affective context, only the signal structure is meant: this study cannot assume the intended receiver of this signal (i.e., whether a vocalisation is directed at other auks or the threat itself [60]) or whether and how this intended receiver interprets it. Importantly, the expression patterns observed in this study align with both the patterns observed in the adults of the species [13], and the general trends seen in other groups taxa [6, 41–47].

Inquiries into emotions of non-human animals requires taking a perspective relevant to the animal, and using robust, conservative measures [67]—ideally, physiological measures should be used, but external measures such as vocal expression patterns prove extremely helpful when such measures are impossible to take [11, 12]. While affective states in birds have been studied in depth in some species under controlled, experimental conditions [43, 48, 68], data on non-captive animals are still scarce. Our results contribute to the growing body of research on emotions in the wild, and mostly support the general trends seen in affective signals across the vertebrate evolutionary lines [6, 41–47, 62].

## Conclusions

Calls of the little auk chicks carry information about their production contexts early in ontogeny, i.e. within the first week after hatching. Acoustic differences between calls uttered during handling (negative context/elicited avoidance) and inside the nest during interaction with a parent (positive context/elicited approach) are mostly in line with emotional expression patterns observed across taxa, supporting its evolutionary continuity. Our findings present the first evidence of affective expression in seabird chicks, and suggest that little auk chicks might effectively convey socially important messages early in development.

## Supporting information

**S1 File. Full descriptions of the two additional analyses performed for this study.** (DOCX)

## Acknowledgments

Many thanks to Dariusz Jakubas, Antoine Grissot, Marion Devogel, Mateusz Barcikowski, and the members of Polish Polar Expeditions for their support in the field, and to Roger Mundry for sharing his pDFA function code.

## Author Contributions

**Conceptualization:** Anna N. Osiecka, Elodie F. Briefer.

**Data curation:** Anna N. Osiecka.

**Formal analysis:** Anna N. Osiecka.

**Funding acquisition:** Anna N. Osiecka, Katarzyna Wojczulanis-Jakubas.

**Investigation:** Anna N. Osiecka, Feliksa Żurawska, Katarzyna Wojczulanis-Jakubas.

**Methodology:** Anna N. Osiecka, Elodie F. Briefer.

**Project administration:** Anna N. Osiecka, Katarzyna Wojczulanis-Jakubas.

**Resources:** Dorota Kidawa.

**Supervision:** Elodie F. Briefer, Katarzyna Wojczulanis-Jakubas.

**Validation:** Anna N. Osiecka.

**Visualization:** Anna N. Osiecka.

**Writing – original draft:** Anna N. Osiecka.

**Writing – review & editing:** Anna N. Osiecka, Elodie F. Briefer, Dorota Kidawa, Feliksa Żurawska, Katarzyna Wojczulanis-Jakubas.

## References

1. Pollard K. A. & Blumstein D. T. (2011). Social Group Size Predicts the Evolution of Individuality. *Current Biology*, 21, 413–417. <https://doi.org/10.1016/j.cub.2011.01.051> PMID: 21333537
2. Leighton G. M. & Birmingham T. (2021). Multiple factors affect the evolution of repertoire size across birds. *Behavioral Ecology*, 32, 380–385. <https://doi.org/10.1093/beheco/araa139>
3. Paul E. S. & Mendl M. T. (2018). Animal emotion: Descriptive and prescriptive definitions and their implications for a comparative perspective. *Applied Animal Behaviour Science*, 205, 202–209. <https://doi.org/10.1016/j.applanim.2018.01.008> PMID: 30078924
4. Russell J. A. (1980). A circumplex model of affect. *Journal of Personality and Social Psychology*, 39, 1161–1178. <https://doi.org/10.1037/h0077714>
5. Frijda N. H. (2010). Impulsive action and motivation. *Biological Psychology*, 84, 570–579. <https://doi.org/10.1016/j.biopsycho.2010.01.005> PMID: 20064583
6. Mendl M., Burman O. H. P. & Paul E. S. (2010). An integrative and functional framework for the study of animal emotion and mood. *Proceedings of the Royal Society B: Biological Sciences*, 277, 2895–2904. <https://doi.org/10.1098/rspb.2010.0303>
7. Panksepp J. (2011). The basic emotional circuits of mammalian brains: Do animals have affective lives? *Neuroscience & Biobehavioral Reviews*, 35, 1791–1804. <https://doi.org/10.1016/j.neubiorev.2011.08.003> PMID: 21872619
8. Špinko M. (2012). Social dimension of emotions and its implication for animal welfare. *Applied Animal Behaviour Science*, 138, 170–181. <https://doi.org/10.1016/j.applanim.2012.02.005>
9. Lakin J. L., Jefferis V. E., Cheng C. M. & Chartrand T. L. (2003). The Chameleon Effect as Social Glue: Evidence for the Evolutionary Significance of Nonconscious Mimicry. *Journal of Nonverbal Behavior*, 27, 145–162. <https://doi.org/10.1023/A:1025389814290>
10. de Waal F. B. M. (2011). What is an animal emotion? *Annals of the New York Academy of Sciences*, 1224, 191–206. <https://doi.org/10.1111/j.1749-6632.2010.05912.x> PMID: 21486301
11. Briefer E. F. (2012). Vocal expression of emotions in mammals: mechanisms of production and evidence. *Journal of Zoology*, 288, 1–20. <https://doi.org/10.1111/j.1469-7998.2012.00920.x>
12. Briefer E. F., Vizier E., Gygas L. & Hillmann E. (2019). Expression of emotional valence in pig closed-mouth grunts: Involvement of both source- and filter-related parameters. *Journal of the Acoustical Society of America*, 145, 2895–2908. <https://doi.org/10.1121/1.5100612> PMID: 31153321
13. Osiecka A. N., Briefer E. F., Kidawa D. & Wojczulanis-Jakubas K. (2023). Seabird's cry: repertoire and vocal expression of contextual valence in the little auk (*Alle alle*). *Scientific Reports*, 13, 8623 (2023). <https://doi.org/10.1038/s41598-023-35857-3> PMID: 37244959
14. Briefer E. F., Mandel R., Maigrot A. L., Briefer Freymond S., Bachmann I. & Hillmann E. (2017). Perception of emotional valence in horse whinnies. *Frontiers in Zoology*, 14, 8. <https://doi.org/10.1186/s12983-017-0193-1> PMID: 28203263
15. Maigrot A.-L., Hillmann E. & Briefer E. F. (2022). Cross-species discrimination of vocal expression of emotional valence by Equidae and Suidae. *BMC Biology*, 20, 106. <https://doi.org/10.1186/s12915-022-01311-5> PMID: 35606806
16. Briefer E. F. (2018). Vocal contagion of emotions in non-human animals. *Proceedings of the Royal Society B: Biological Sciences*, 285, 20172783. <https://doi.org/10.1098/rspb.2017.2783> PMID: 29491174
17. Pérez-Manrique A. & Gomila A. (2022). Emotional contagion in nonhuman animals: A review. *WIREs Cognitive Science*, 13(1), e1560. <https://doi.org/10.1002/wcs.1560> PMID: 33951303
18. Wyman M. T., Walkenhorst B., & Manser M. B. (2022). Selection levels on vocal individuality: strategic use or byproduct. *Current Opinion in Behavioral Sciences*, 46, 101140. <https://doi.org/10.1016/j.cobeha.2022.101140>

19. Wojczulanis-Jakubas K., Jakubas D. & Stempniewicz L. (2022). The Little Auk *Alle alle*: an ecological indicator of a changing Arctic and a model organism. *Polar Biology*, 45, 163–176. <https://doi.org/10.1007/s00300-021-02981-7>
20. Wojczulanis-Jakubas K., Araya-Salas M. & Jakubas D. (2018). Seabird parents provision their chick in a coordinated manner. *PLoS One*, 13, e0189969. <https://doi.org/10.1371/journal.pone.0189969> PMID: 29320525
21. Kidawa D., Wojczulanis-Jakubas K., Jakubas D., Palme R. & Barcikowski M. (2023). Mine or my neighbours' offspring: an experimental study on parental discrimination of offspring in a colonial seabird, the little auk *Alle alle*. *Scientific Reports*, 13, 15088. <https://doi.org/10.1038/s41598-023-41925-5> PMID: 37699973
22. Buchanan K., Burt de Perera T., Carere C., Carter T., Hailey A., Hubrecht R., et al. (2012). Guidelines for the treatment of animals in behavioural research and teaching. *Animal Behaviour*, 55(1): 229–234. <https://doi.org/10.1006/anbe.1996.0293>
23. Osiecka A. N., Briefer E. F., Kidawa D. & Wojczulanis-Jakubas K. (2023). Social calls of the little auk (*Alle alle*) reflect body size and possibly partnership, but not sex. *Royal Society Open Science* 10230845230845. <http://doi.org/10.1098/rsos.230845>
24. Mendl M., Neville V. & Paul E. S. (2022). Bridging the Gap: Human Emotions and Animal Emotions. *Affective Science*, 3, 703–712. <https://doi.org/10.1007/s42761-022-00125-6> PMID: 36519148
25. R Core Team. (2022). A language and environment for statistical computing. R Foundation for Statistical Computing, Vienna, Austria. <https://www.r-project.org/>
26. Anikin A. (2019). Soundgen: An open-source tool for synthesizing nonverbal vocalizations. *Behavior Research Methods*, 51, 778–792. <https://doi.org/10.3758/s13428-018-1095-7> PMID: 30054898
27. Mundry R., & Sommer C. (2007). Discriminant function analysis with nonindependent data: consequences and an alternative. *Animal Behaviour*, 74(4), 965–976. <https://doi.org/10.1016/j.anbehav.2006.12.028>
28. Ripley B., Venables B., Bates D. M., Hornik K., Gebhardt A., Firth D. (2023) MASS: Support Functions and Datasets for Venables and Ripley's MASS. <https://cran.r-project.org/web/packages/MASS/index.html>
29. Bates D., Maechler M., Bolker B., Walker S., Christensen R. H. B., Singmann H., et al. (2009). lme4: Linear Mixed-Effects Models using 'Eigen' and S4. <https://cran.r-project.org/web/packages/lme4/index.html>
30. R Core Team. (2022). The R Stats Package. R Foundation for Statistical Computing, Vienna, Austria. <https://r-project.org>
31. Halekoh U., Højsgaard S. (2023). pbrttest: Parametric Bootstrap, Kenward-Roger and Satterthwaite Based Methods for Test in Mixed Models <https://CRAN.R-project.org/package=pbrttest>
32. Steiner M., Grieder S., Revelle W., Auerswald M., Moshagen M., Ruscio J., et al. (2023). EFAtools: Fast and Flexible Implementations of Exploratory Factor Analysis Tools. <https://CRAN.R-project.org/package=EFAtools>
33. Beecher M. D. (1989). Signalling systems for individual recognition: an information theory approach. *Animal Behaviour*, 38(2), 248–261. [https://doi.org/10.1016/S0003-3472\(89\)80087-9](https://doi.org/10.1016/S0003-3472(89)80087-9)
34. Linhart P. (2019). IDmeasurer: Assessment of Individual Identity in Animal Signals. <https://cran.r-project.org/package=Idmeasurer>
35. Linhart P., Osiejuk T. S., Budka M., Šálek M., Špinka M., Policht R., et al. (2019). Measuring individual identity information in animal signals: overview and performance of available identity metrics. *Methods in Ecology and Evolution*, 10(9), 1558–1570. <https://doi.org/10.1111/2041-210X.13238>
36. Sueur J., Aubin T. & Simonis C. (2008). Seewave, a free modular tool for sound analysis and synthesis. *Bioacoustics*, 18, 213–226. <https://doi.org/10.1080/09524622.2008.9753600>
37. Frerebeau N., Lebrun B., Arel-Bundock V. & Stervbo U. (2023). khroma: Colour Schemes for Scientific Data Visualization. <https://cran.r-project.org/web/packages/khroma/index.html>
38. Crameri F., Shephard G. E. & Heron P. J. (2020). The misuse of colour in science communication. *Nature Communications*, 11, 5444. <https://doi.org/10.1038/s41467-020-19160-7> PMID: 33116149
39. Crameri F. (2018). Scientific colour maps: Perceptually uniform and colour-blind friendly, <https://doi.org/10.5281/zenodo.1243862>, code repository at [www.fabiocrameri.ch/colormaps](http://www.fabiocrameri.ch/colormaps)
40. Melville J., Lun A., Nadhir Djekidel M., Hao Y., & Eddelbuettel D. (2023). uwot: The Uniform Manifold Approximation and Projection (UMAP) Method for Dimensionality Reduction. <https://CRAN.R-project.org/package=uwot>

41. Herborn K. A., McElligott A. G., Mitchell M. A., Sandilands V., Bradshaw B., & Asher L. (2020). Spectral entropy of early-life distress calls as an iceberg indicator of chicken welfare. *Journal of the Royal Society Interface*, 17, 20200086. <https://doi.org/10.1098/rsif.2020.0086> PMID: 32517633
42. Schwartz J. W., Sanchez M. M. & Gouzoules H. (2022). Vocal expression of emotional arousal across two call types in young rhesus macaques. *Animal Behaviour*, 190, 125–138. <https://doi.org/10.1016/j.anbehav.2022.05.017> PMID: 36337435
43. Perez E. C., Elie J. E., Soulage C. O., Soula H. A., Mathevon N., & Vignal C. (2012). The acoustic expression of stress in a songbird: Does corticosterone drive isolation-induced modifications of zebra finch calls? *Hormones and Behavior*, 61, 573–581. <https://doi.org/10.1016/j.yhbeh.2012.02.004> PMID: 22387308
44. Vergne A. L., Pritz M. B. & Mathevon N. (2009). Acoustic communication in crocodylians: from behaviour to brain. *Biological Reviews*, 84, 391–411. <https://doi.org/10.1111/j.1469-185X.2009.00079.x> PMID: 19659884
45. Linhart P., Ratcliffe V. F., Reby D. & Špinko M. (2015). Expression of Emotional Arousal in Two Different Piglet Call Types. *PLoS One*, 10, e0135414. <https://doi.org/10.1371/journal.pone.0135414> PMID: 26274816
46. Scheiner E., Hammerschmidt K., Jürgens U. & Zwirner P. (2002). Acoustic Analyses of Developmental Changes and Emotional Expression in the Preverbal Vocalizations of Infants. *Journal of Voice*, 16, 509–529. [https://doi.org/10.1016/s0892-1997\(02\)00127-3](https://doi.org/10.1016/s0892-1997(02)00127-3) PMID: 12512639
47. Maignot A.-L., Hillmann E., Anne C. & Briefer E. F. (2017). Vocal expression of emotional valence in Przewalski's horses (*Equus przewalskii*). *Scientific Reports*, 7, 8779. <https://doi.org/10.1038/s41598-017-09437-1> PMID: 28821880
48. Papini M. R., Penagos-Corzo J. C. & Pérez-Acosta A. M. (2019). Avian Emotions: Comparative Perspectives on Fear and Frustration. *Frontiers in Psychology*, 9, 2707. <https://doi.org/10.3389/fpsyg.2018.02707> PMID: 30705652
49. Anderson M. G., Brunton D. H., & Hauber M. E. (2010). Reliable information content and ontogenetic shift in begging calls of grey warbler nestlings. *Ethology*, 116(4), 357–365. <https://doi.org/10.1111/j.1439-0310.2010.01750.x>
50. Leonard M. L., & Horn A. G. (2001). Begging in the absence of parents by nestling tree swallows. *Behavioral Ecology*, 12(4), 501–505. <https://doi.org/10.1093/beheco/12.4.501>
51. Cockrem J. F., & Silverin B. (2002). Variation within and between birds in corticosterone responses of great tits (*Parus major*). *General and comparative Endocrinology*, 125(2), 197–206. <https://doi.org/10.1006/gcen.2001.7750> PMID: 11884065
52. Müller C., Jenni-Eiermann S., Blondel J., Perret P., Caro S. P., Lambrechts M., et al. (2006). Effect of human presence and handling on circulating corticosterone levels in breeding blue tits (*Parus caeruleus*). *General and Comparative Endocrinology*, 148(2), 163–171. <https://doi.org/10.1016/j.ygcen.2006.02.012> PMID: 16581070
53. Sockman K. W., & Schwabl H. (2001). Plasma corticosterone in nestling American kestrels: effects of age, handling stress, yolk androgens, and body condition. *General and comparative endocrinology*, 122(2), 205–212. <https://doi.org/10.1006/gcen.2001.7626> PMID: 11316426
54. Kitaysky A. S., Kitaiskaia E. V., Wingfield J. C., & Piatt J. F. (2001). Dietary restriction causes chronic elevation of corticosterone and enhances stress response in red-legged kittiwake chicks. *Journal of Comparative Physiology B*, 171, 701–709. <https://doi.org/10.1007/s003600100230> PMID: 11765979
55. Loiseau C., Sorci G., Dano S., & Chastel O. (2008). Effects of experimental increase of corticosterone levels on begging behavior, immunity and parental provisioning rate in house sparrows. *General and Comparative Endocrinology*, 155(1), 101–108. <https://doi.org/10.1016/j.ygcen.2007.03.004> PMID: 17448473
56. Kidawa D., Barcikowski M., & Palme R. (2017). Parent-offspring interactions in a long-lived seabird, the Little Auk (*Alle alle*): begging and provisioning under simulated stress. *Journal of Ornithology*, 158, 145–157.
57. Osiecka A. N., Briefer E. F., Kidawa D. & Wojczulanis-Jakubas K. Strong individual distinctiveness across the vocal repertoire of a colonial seabird, the little auk, *Alle alle*. In press in *Animal Behaviour*. <https://doi.org/10.1016/j.anbehav.2024.02.009>
58. Green A., Clark C., Favaro L., Lomax S., & Reby D. (2019). Vocal individuality of Holstein-Friesian cattle is maintained across putatively positive and negative farming contexts. *Scientific Reports*, 9, 18468. <https://doi.org/10.1038/s41598-019-54968-4> PMID: 31804583
59. Reers H., & Jacot A. (2011). The effect of hunger on the acoustic individuality in begging calls of a colonially breeding weaver bird. *BMC ecology*, 11, 1–10. <https://doi.org/10.1186/1472-6785-11-3>



60. Keenan S., Mathevon N., Stevens J. M., Nicolè F., Zuberbühler K., Guéry J. P., et al. (2020). The reliability of individual vocal signature varies across the bonobo's graded repertoire. *Animal Behaviour*, 169, 9–21. <https://doi.org/10.1016/j.anbehav.2020.08.024>
61. Penna M., & Veloso A. (1987). Vocalizations by Andean frogs of the genus *Telmatobius* (Leptodactylidae). *Herpetologica*, 43(1), 208–216. <https://www.jstor.org/stable/3892053>
62. Lingle S., Wyman M. T., Kotrba R., Teichroeb L. J., & Romanow C. A. (2012). What makes a cry a cry? A review of infant distress vocalizations. *Current Zoology*, 58(5), 698–726. <https://doi.org/10.1093/czoolo/58.5.698>
63. Gladbach A., Büßer C., Mundry R., & Quillfeldt P. (2009). Acoustic parameters of begging calls indicate chick body condition in Wilson's storm-petrels *Oceanites oceanicus*. *Journal of ethology*, 27, 267–274. <https://doi.org/10.1007/s10164-008-0115-y>
64. Soulsbury C. D., Gray H. E., Smith L. M., Braithwaite V., Cotter S. C., Elweood R. W., et al. (2020). The welfare and ethics of research involving wild animals: A primer. *Methods in Ecology and Evolution* 11 (10), 1164–1181. <https://doi.org/10.1111/2041-210X.13435>
65. Calcarì C., Pilenga C., Baciadonna L., Gamba M., & Favaro L. (2021). Long-term stability of vocal individuality cues in a territorial and monogamous seabird. *Animal Cognition*, 24(6), 1165–1169. <https://doi.org/10.1007/s10071-021-01518-z> PMID: 33973095
66. Klenova A.V., Zubakin V.A. & Zubakina E.V. (2012). Inter- and intra-season stability of vocal individual signatures in a social seabird, the crested auklet. *Acta Ethologica*, 15, 141–152 <https://doi.org/10.1007/s10211-011-0120-y>
67. Kret M. E., Massen J. J. M. & de Waal F. B. M. (2022). My Fear Is Not, and Never Will Be, Your Fear: On Emotions and Feelings in Animals. *Affective Science*, 3, 182–189. <https://doi.org/10.1007/s42761-021-00099-x> PMID: 36042781
68. Adriaense J. E. C., Martin J. S., Schiestl M., Lamm C. & Bugnyar T. (2019). Negative emotional contagion and cognitive bias in common ravens (*Corvus corax*). *Proceedings of the National Academy of Sciences*, 116, 11547–11552. <https://doi.org/10.1073/pnas.1817066116> PMID: 31110007
